# Supplementary material for: Epidemiological analysis of coronary heart disease and its main risk factors: are their associations multiplicative, additive, or interactive?
Source: PubMed Central journal article supplement (PMC9132387; doi:10.1080/07853890.2022.2078875), 2022-05-23
Supplement: IANN_A_2078875_SM7343.pdf [file IANN_A_2078875_SM7343.pdf]

**Supplementary table 1.** 95% CIs for risk (RR) to detect multiplicative interaction and the interaction contrast ratio (ICR) together with the risk difference (RD) to detect additive interaction.

| Interaction                                                          | Multiplicative <sup>1</sup>                     | Multiplicative <sup>2</sup>                     | Additive <sup>1</sup>                                 | Additive <sup>2</sup>                                 |
|----------------------------------------------------------------------|-------------------------------------------------|-------------------------------------------------|-------------------------------------------------------|-------------------------------------------------------|
| Age ×<br>No family history (0)<br>Family history (1)                 | $p = 0.640$<br>RR0: 1.56–2.60<br>RR1: 1.15–1.69 | $p = 0.228$<br>RR0: 1.63–2.51<br>RR1: 1.21–1.64 | ICR: -1.27–0.85<br>RD0: 0.13–0.24<br>RD1: 0.06–0.20   | ICR: -1.23–1.91<br>RD0: 0.16–0.27<br>RD1: 0.09–0.21   |
| Diabetes ×<br>No family history (0)<br>Family history (1)            | $p = 0.969$<br>RR0: 1.16–1.92<br>RR1: 1.14–1.74 | $p = 0.671$<br>RR0: 1.26–1.81<br>RR1: 1.15–1.53 | ICR: -1.02–2.43<br>RD0: 0.05–0.26<br>RD1: 0.05–0.28   | ICR: -1.29–3.43<br>RD0: 0.09–0.27<br>RD1: 0.07–0.24   |
| Smoking ×<br>No family history (0)<br>Family history (1)             | $p = 0.127$<br>RR0: 0.79–1.16<br>RR1: 0.98–1.35 | $p = 0.131$<br>RR0: 0.83–1.12<br>RR1: 0.99–1.25 | ICR: -1.28–0.05<br>RD0: -0.07–0.05<br>RD1: -0.01–0.13 | ICR: -0.12–2.34<br>RD0: -0.07–0.04<br>RD1: 0.00–0.11  |
| Obesity ×<br>No family history (0)<br>Family history (1)             | $p = 0.594$<br>RR0: 0.97–1.49<br>RR1: 1.06–1.51 | $p = 0.825$<br>RR0: 0.94–1.34<br>RR1: 1.01–1.31 | ICR: -0.39–1.41<br>RD0: -0.01–0.14<br>RD1: 0.02–0.19  | ICR: -0.95–1.68<br>RD0: -0.02–0.11<br>RD1: 0.00–0.14  |
| <b>High S-LDL-C</b> ×<br>No family history (0)<br>Family history (1) | $p = 0.665$<br>RR0: 1.20–1.70<br>RR1: 1.22–1.66 | $p = 0.809$<br>RR0: 1.20–1.58<br>RR1: 1.19–1.48 | ICR: -0.16–1.31<br>RD0: 0.06–0.17<br>RD1: 0.08–0.22   | ICR: -0.24–2.32<br>RD0: 0.07–0.17<br>RD1: 0.09–0.19   |
| Hypertension ×<br>No family history (0)<br>Family history (1)        | $p = 0.291$<br>RR0: 1.23–1.78<br>RR1: 1.05–1.46 | $p = 0.351$<br>RR0: 1.40–1.92<br>RR1: 1.19–1.52 | ICR: -0.78–0.62<br>RD0: 0.07–0.18<br>RD1: 0.02–0.15   | ICR: -0.84–1.69<br>RD0: 0.12–0.22<br>RD1: 0.08–0.19   |
| Diabetes ×<br>Age <50 (0)<br>Age >50 (1)                             | $p = 0.563$<br>RR0: 1.14–2.60<br>RR1: 1.13–1.61 | $p = 0.813$<br>RR0: 1.01–2.08<br>RR1: 1.20–1.51 | ICR: -2.08–2.33<br>RD0: 0.02–0.34<br>RD1: 0.05–0.23   | ICR: -0.50–2.83<br>RD0: 0.00–0.27<br>RD1: 0.09–0.23   |
| Smoking ×<br>Age <50 (0)<br>Age >50 (1)                              | $p = 0.767$<br>RR0: 0.76–1.38<br>RR1: 0.93–1.22 | $p = 0.898$<br>RR0: 0.83–1.35<br>RR1: 0.96–1.16 | ICR: -0.55–0.81<br>RD0: -0.07–0.08<br>RD1: -0.03–0.08 | ICR: -0.49–0.71<br>RD0: -0.05–0.09<br>RD1: -0.02–0.07 |
| Obesity ×<br>Age <50 (0)<br>Age >50 (1)                              | $p = 0.032$<br>RR0: 1.27–2.33<br>RR1: 0.95–1.30 | $p = 0.174$<br>RR0: 1.05–1.82<br>RR1: 0.96–1.20 | ICR: -2.22–0.42<br>RD0: 0.06–0.27<br>RD1: -0.02–0.11  | ICR: -1.30–0.59<br>RD0: 0.01–0.21<br>RD1: -0.02–0.09  |
| <b>High S-LDL-C</b> ×<br>Age <50 (0)<br>Age >50 (1)                  | $p = 0.002$<br>RR0: 1.59–2.79<br>RR1: 1.07–1.38 | $p = 0.005$<br>RR0: 1.48–2.34<br>RR1: 1.10–1.32 | ICR: -2.24–0.29<br>RD0: 0.12–0.28<br>RD1: 0.03–0.13   | ICR: -1.45–0.52<br>RD0: 0.12–0.27<br>RD1: 0.04–0.13   |
| Hypertension ×<br>Age <50 (0)<br>Age >50 (1)                         | $p = 0.932$<br>RR0: 1.04–1.84<br>RR1: 1.14–1.50 | $p = 0.194$<br>RR0: 1.07–1.73<br>RR1: 1.31–1.62 | ICR: -0.27–1.27<br>RD0: 0.01–0.15<br>RD1: 0.06–0.16   | ICR: 0.60–1.92<br>RD0: 0.02–0.16<br>RD1: 0.12–0.21    |
| Smoking ×<br>No diabetes (0)<br>Diabetes (1)                         | $p = 0.956$<br>RR0: 0.92–1.20<br>RR1: 0.74–1.43 | $p = 0.194$<br>RR0: 0.97–1.18<br>RR1: 0.72–1.16 | ICR: -1.26–1.75<br>RD0: -0.03–0.06<br>RD1: -0.15–0.18 | ICR: -1.55–0.61<br>RD0: -0.01–0.07<br>RD1: -0.18–0.08 |
| Obesity ×<br>No diabetes (0)<br>Diabetes (1)                         | $p = 0.923$<br>RR0: 1.01–1.38<br>RR1: 0.82–1.51 | $p = 0.980$<br>RR0: 0.96–1.23<br>RR1: 0.86–1.30 | ICR: -1.22–1.92<br>RD0: 0.00–0.13<br>RD1: -0.10–0.21  | ICR: -0.95–1.35<br>RD0: -0.02–0.09<br>RD1: -0.09–0.15 |

<sup>1</sup>Study participants free of coronary heart disease at baseline ( $n = 1958$ ). <sup>2</sup>All study participants ( $n = 2682$ ).

**Frames** highlight statistically significant interactions.

Supplementary table 1. Continues.

| Interaction                                  | Multiplicative <sup>1</sup>   | Multiplicative <sup>2</sup>   | Additive <sup>1</sup>                | Additive <sup>2</sup>                |
|----------------------------------------------|-------------------------------|-------------------------------|--------------------------------------|--------------------------------------|
| <b>High S-LDL-C</b> ×<br>No diabetes (0)     | $p = 0.478$<br>RR0: 1.28–1.65 | $p = 0.542$<br>RR0: 1.26–1.52 | ICR: -1.59–2.25<br>RD0: 0.09–0.18    | ICR: -1.08–1.95<br>RD0: 0.10–0.17    |
| Diabetes (1)                                 | RR1: 0.87–1.60                | RR1: 0.95–1.44                | RD1: -0.07–0.24                      | RD1: -0.03–0.21                      |
| Hypertension ×<br>No diabetes (0)            | $p = 0.755$<br>RR0: 1.19–1.54 | $p = 0.812$<br>RR0: 1.32–1.62 | ICR: -1.68–1.77<br>RD0: -0.09–0.25   | ICR: -0.66–2.14<br>RD0: 0.11–0.19    |
| Diabetes (1)                                 | RR1: 0.82–1.73                | RR1: 1.01–1.93                | RD1: 0.06–0.15                       | RD1: 0.02–0.32                       |
| Obesity ×<br>No smoking (0)                  | $p = 0.034$<br>RR0: 1.15–1.57 | $p = 0.007$<br>RR0: 1.11–1.41 | ICR: -1.50–(-0.01)<br>RD0: 0.05–0.18 | ICR: -1.29–(-0.19)<br>RD0: 0.04–0.16 |
| Smoking (1)                                  | RR1: 0.66–1.28                | RR1: 0.69–1.12                | RD1: -0.04–0.09                      | RD1: -0.15–0.04                      |
| <b>High S-LDL-C</b> ×<br>No smoking (0)      | $p = 0.830$<br>RR0: 1.22–1.62 | $p = 0.953$<br>RR0: 1.22–1.51 | ICR: -0.52–0.68<br>RD0: 0.07–0.18    | ICR: -0.49–0.50<br>RD0: 0.08–0.18    |
| Smoking (1)                                  | RR1: 1.17–1.77                | RR1: 1.15–1.56                | RD1: 0.06–0.21                       | RD1: 0.06–0.19                       |
| Hypertension ×<br>No smoking (0)             | $p = 0.649$<br>RR0: 1.16–1.58 | $p = 0.887$<br>RR0: 1.34–1.73 | ICR: -0.39–0.78<br>RD0: 0.05–0.16    | ICR: -0.47–0.68<br>RD0: 0.12–0.21    |
| Smoking (1)                                  | RR1: 1.15–1.75                | RR1: 1.25–1.72                | RD1: 0.05–0.21                       | RD1: 0.10–0.23                       |
| <b>High S-LDL-C</b> ×<br>No obesity (0)      | $p = 0.870$<br>RR0: 1.25–1.63 | $p = 0.895$<br>RR0: 1.24–1.51 | ICR: -0.53–1.67<br>RD0: 0.08–0.18    | ICR: -0.54–1.05<br>RD0: 0.09–0.17    |
| Obesity (1)                                  | RR1: 1.09–1.76                | RR1: 1.08–1.56                | RD1: 0.04–0.26                       | RD1: 0.04–0.22                       |
| Hypertension ×<br>No obesity (0)             | $p = 0.953$<br>RR0: 1.17–1.54 | $p = 0.676$<br>RR0: 1.33–1.64 | ICR: -0.91–0.87<br>RD0: 0.06–0.15    | ICR: -1.55–0.25<br>RD0: 0.12–0.20    |
| Obesity (1)                                  | RR1: 0.91–1.87                | RR1: 1.13–2.18                | RD1: -0.03–0.23                      | RD1: 0.07–0.29                       |
| Hypertension ×<br>No <b>high S-LDL-C</b> (0) | $p = 0.100$<br>RR0: 1.31–1.91 | $p = 0.074$<br>RR0: 1.47–2.01 | ICR: -1.00–0.69<br>RD0: 0.08–0.19    | ICR: -0.65–0.88<br>RD0: 0.14–0.24    |
| <b>High S-LDL-C</b> (1)                      | RR1: 1.03–1.42                | RR1: 1.16–1.50                | RD1: 0.01–0.15                       | RD1: 0.07–0.19                       |

<sup>1</sup>Study participants free of coronary heart disease at baseline ( $n = 1958$ ). <sup>2</sup>All study participants ( $n = 2682$ ).

Frames highlight statistically significant interactions.
